# Supplementary material
Source: PubMed Central journal article supplement (PMC4958232)
Supplement: AAC.00825-16_zac008165411so1.pdf [file AAC.00825-16_zac008165411so1.pdf]

# Supplementary Appendix

**S1 Table. Quality Assessment**

| Quality assessment criteria | Amer | Apasarthana rak A | Bantar C | Borde JP 1 | Borde JP 2 | Borde JP 3 |
|-----------------------------|------|-------------------|----------|------------|------------|------------|
|-----------------------------|------|-------------------|----------|------------|------------|------------|

**Selection**

|                                                                           |   |   |   |   |   |   |
|---------------------------------------------------------------------------|---|---|---|---|---|---|
| Representativeness of exposed cohort?                                     | * | * | * | * | * |   |
| Selection of the non-exposed cohort?                                      | * | * | * | * | * | * |
| Ascertainment of exposure?                                                | * | * | * | * | * | * |
| Demonstration that outcome of interest was not present at start of study? | * | * | * | * | * | * |

**Comparability**

|                                                                 |   |    |   |    |    |    |
|-----------------------------------------------------------------|---|----|---|----|----|----|
| Comparability of cohorts on the basis of the design or analysis | * | ** | * | ** | ** | ** |
|-----------------------------------------------------------------|---|----|---|----|----|----|

**Outcome**

|                                             |   |   |   |   |   |   |
|---------------------------------------------|---|---|---|---|---|---|
| Assessment of outcome                       | * | * | * | * | * | * |
| Follow-up long enough for outcomes to occur |   | * |   | * | * | * |
| Adequacy of follow-up of cohorts            |   | * |   | * | * | * |

|              |          |          |          |          |          |          |
|--------------|----------|----------|----------|----------|----------|----------|
| <b>Score</b> | <b>5</b> | <b>9</b> | <b>5</b> | <b>9</b> | <b>9</b> | <b>8</b> |
|--------------|----------|----------|----------|----------|----------|----------|

| Quality assessment criteria | Boyles TH | Bozkurt | Cisneros | Cook | Gould | Hou D | Kim YC | Lin YS | Mach |
|-----------------------------|-----------|---------|----------|------|-------|-------|--------|--------|------|
|-----------------------------|-----------|---------|----------|------|-------|-------|--------|--------|------|

**Selection**

|                                                                           |   |   |   |   |   |   |   |   |   |
|---------------------------------------------------------------------------|---|---|---|---|---|---|---|---|---|
| Representativeness of exposed cohort?                                     | * | * | * | * | * |   | * | * | * |
| Selection of the non-exposed cohort?                                      | * | * | * | * | * | * | * | * |   |
| Ascertainment of exposure?                                                | * | * | * | * | * | * | * | * |   |
| Demonstration that outcome of interest was not present at start of study? | * | * | * | * | * | * | * | * | * |

**Comparability**

|                                                                 |   |   |   |   |  |   |   |   |  |
|-----------------------------------------------------------------|---|---|---|---|--|---|---|---|--|
| Comparability of cohorts on the basis of the design or analysis | * | * | * | * |  | * | * | * |  |
|-----------------------------------------------------------------|---|---|---|---|--|---|---|---|--|

**Outcome**

|                                             |   |   |   |   |   |   |   |   |   |
|---------------------------------------------|---|---|---|---|---|---|---|---|---|
| Assessment of outcome                       | * | * | * | * | * | * | * | * | * |
| Follow-up long enough for outcomes to occur | * |   | * | * | * | * | * | * | * |
| Adequacy of follow-up of cohorts            | * |   |   | * |   | * | * | * | * |

|              |          |          |          |          |          |          |          |          |          |
|--------------|----------|----------|----------|----------|----------|----------|----------|----------|----------|
| <b>Score</b> | <b>8</b> | <b>5</b> | <b>7</b> | <b>8</b> | <b>6</b> | <b>7</b> | <b>8</b> | <b>8</b> | <b>5</b> |
|--------------|----------|----------|----------|----------|----------|----------|----------|----------|----------|

| Quality assessment criteria | Meyer E | Ng CK | Nitsch-Osu | Nitsch-Osuch 2 | Niwa T | Pate PG | Peto Z |
|-----------------------------|---------|-------|------------|----------------|--------|---------|--------|
|-----------------------------|---------|-------|------------|----------------|--------|---------|--------|

**Selection**

|                                                                           |   |   |   |   |   |   |   |
|---------------------------------------------------------------------------|---|---|---|---|---|---|---|
| Representativeness of exposed cohort?                                     |   |   |   |   | * | * |   |
| Selection of the non-exposed cohort?                                      | * | * | * | * | * | * | * |
| Ascertainment of exposure?                                                | * | * | * | * | * | * | * |
| Demonstration that outcome of interest was not present at start of study? | * | * | * | * | * | * | * |

**Comparability**

|                                                                 |  |  |   |   |   |   |  |
|-----------------------------------------------------------------|--|--|---|---|---|---|--|
| Comparability of cohorts on the basis of the design or analysis |  |  | * | * | * | * |  |
|-----------------------------------------------------------------|--|--|---|---|---|---|--|

**Outcome**

|                                             |   |   |   |   |   |   |   |
|---------------------------------------------|---|---|---|---|---|---|---|
| Assessment of outcome                       | * | * | * | * | * | * | * |
| Follow-up long enough for outcomes to occur | * | * | * | * |   |   | * |
| Adequacy of follow-up of cohorts            | * | * | * | * |   |   | * |

|              |          |          |          |          |          |          |          |
|--------------|----------|----------|----------|----------|----------|----------|----------|
| <b>Score</b> | <b>6</b> | <b>6</b> | <b>6</b> | <b>6</b> | <b>5</b> | <b>6</b> | <b>6</b> |
|--------------|----------|----------|----------|----------|----------|----------|----------|

| Quality assessment criteria | Ruttimann | Storey FD | Yeo CL 1 | Yeo CL 2 |  |  |  |
|-----------------------------|-----------|-----------|----------|----------|--|--|--|
|-----------------------------|-----------|-----------|----------|----------|--|--|--|

**Selection**

|                                                                           |   |   |   |   |  |  |  |
|---------------------------------------------------------------------------|---|---|---|---|--|--|--|
| Representativeness of exposed cohort?                                     | * | * |   | * |  |  |  |
| Selection of the non-exposed cohort?                                      | * | * | * | * |  |  |  |
| Ascertainment of exposure?                                                | * | * | * | * |  |  |  |
| Demonstration that outcome of interest was not present at start of study? | * | * | * | * |  |  |  |

**Comparability**

|                                                                 |   |   |   |   |  |  |  |
|-----------------------------------------------------------------|---|---|---|---|--|--|--|
| Comparability of cohorts on the basis of the design or analysis | * | * | * | * |  |  |  |
|-----------------------------------------------------------------|---|---|---|---|--|--|--|

**Outcome**

|                                             |   |   |   |   |  |  |  |
|---------------------------------------------|---|---|---|---|--|--|--|
| Assessment of outcome                       | * | * | * | * |  |  |  |
| Follow-up long enough for outcomes to occur | * | * | * | * |  |  |  |
| Adequacy of follow-up of cohorts            | * | * | * | * |  |  |  |

|              |          |          |          |          |  |  |  |
|--------------|----------|----------|----------|----------|--|--|--|
| <b>Score</b> | <b>8</b> | <b>8</b> | <b>7</b> | <b>8</b> |  |  |  |
|--------------|----------|----------|----------|----------|--|--|--|

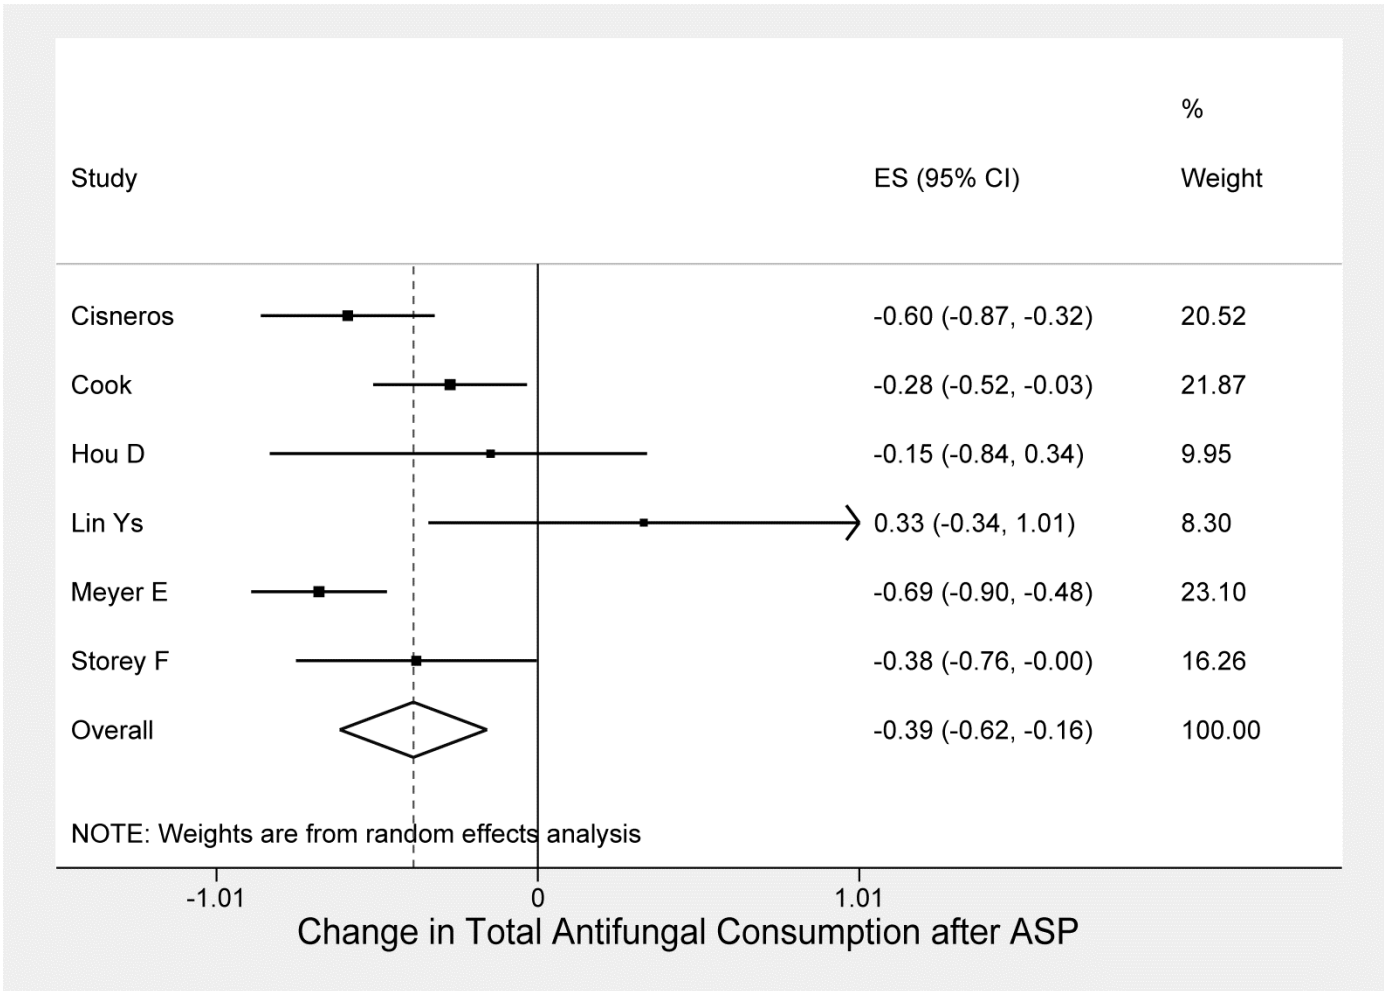

**Supplementary Figure 1. Forest plot of included studies.** Individual and combined change of consumption of antifungals antibiotics after ASP implementation. CI, confidence interval.

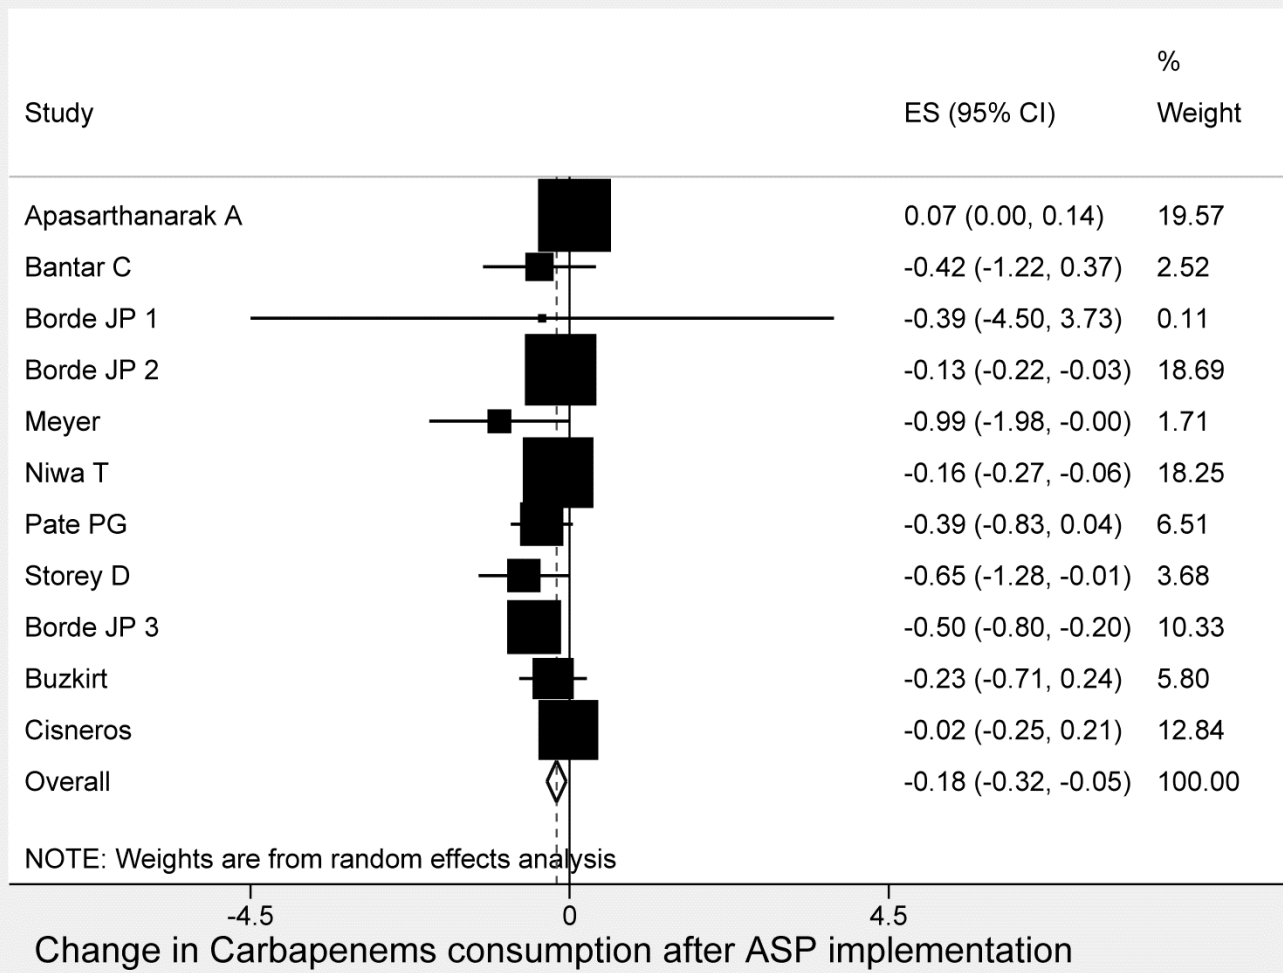

**Supplementary Figure 2. Forest plot of included studies.** Individual and combined change of consumption of carbapenems after ASP implementation. CI, confidence interval

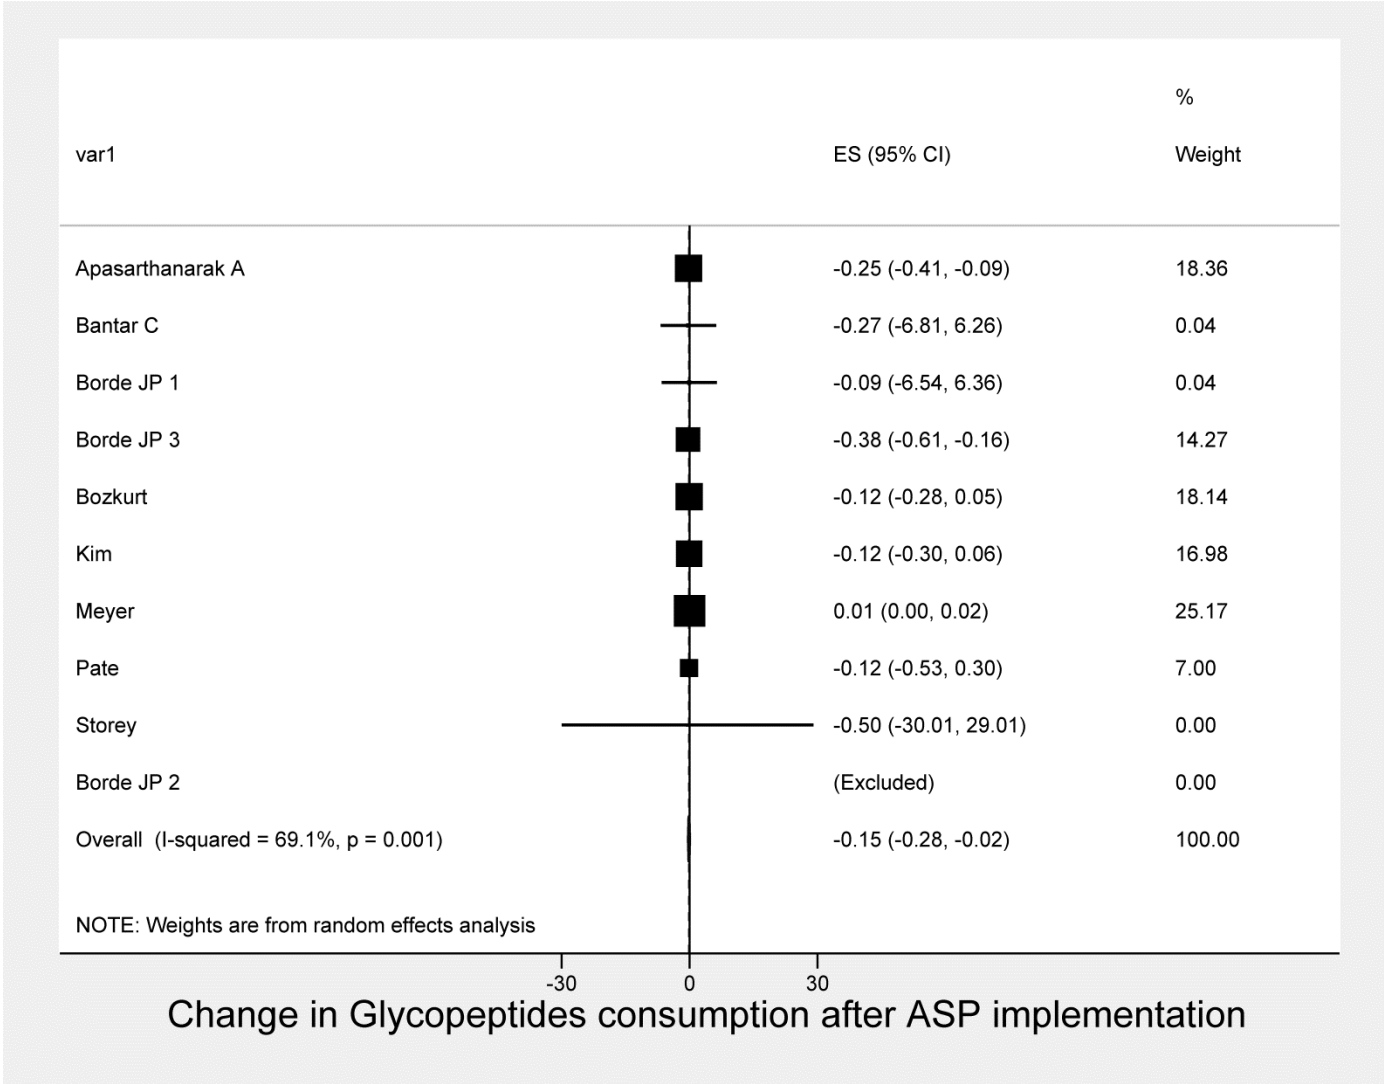

**Supplementary Figure 3. Forest plot of included studies.** Individual and combined change of consumption of glycopeptides after ASP implementation. CI, confidence interval

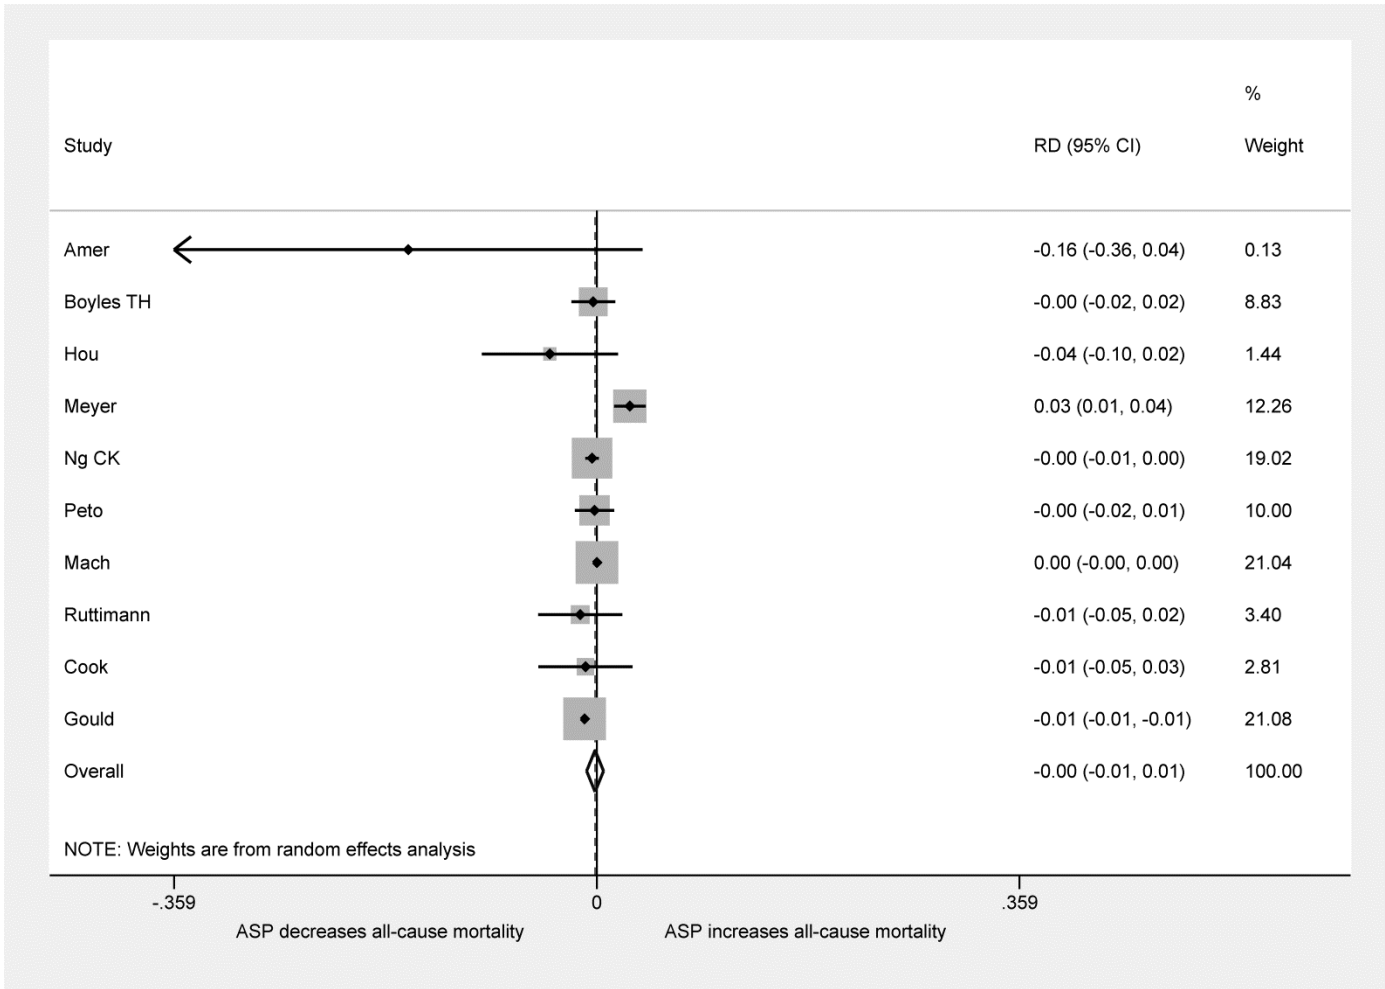

**Supplementary Figure 4. Forest plot of included studies.** Estimated Risk Difference (RD) in all-cause mortality rates before and after ASP implementation. CI, confidence interval.



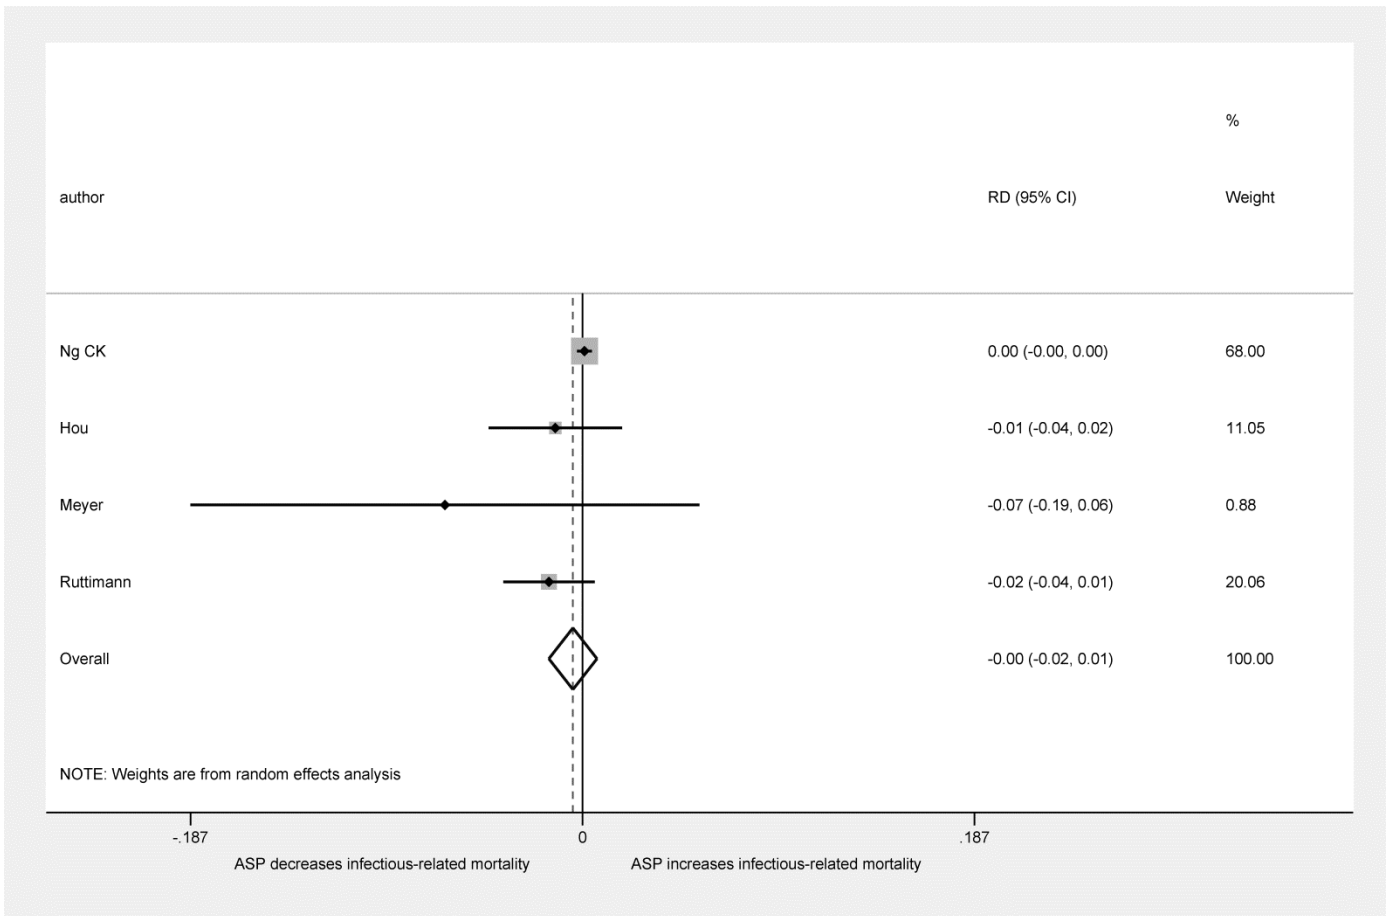

**Supplementary Figure 5. Forest plot of included studies.** Estimated Risk Difference (RD) in infection-related mortality rates before and after ASP implementation. CI, confidence interval

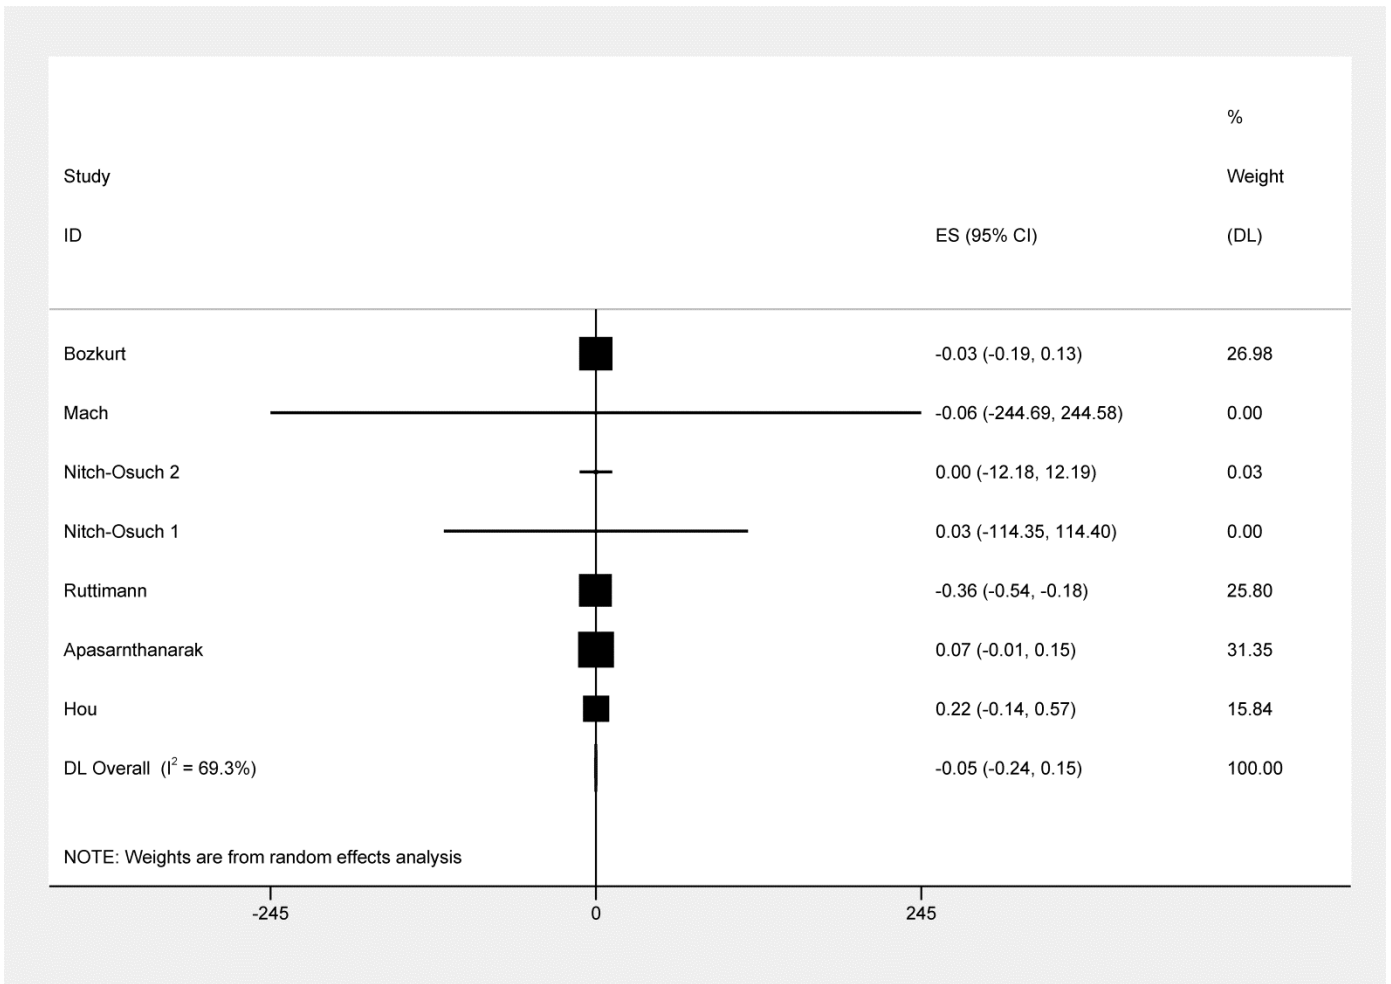

**Supplementary Figure 6. Forest plot of included studies.** Individual and combined change of infection rate after ASP implementation. CI, confidence interval

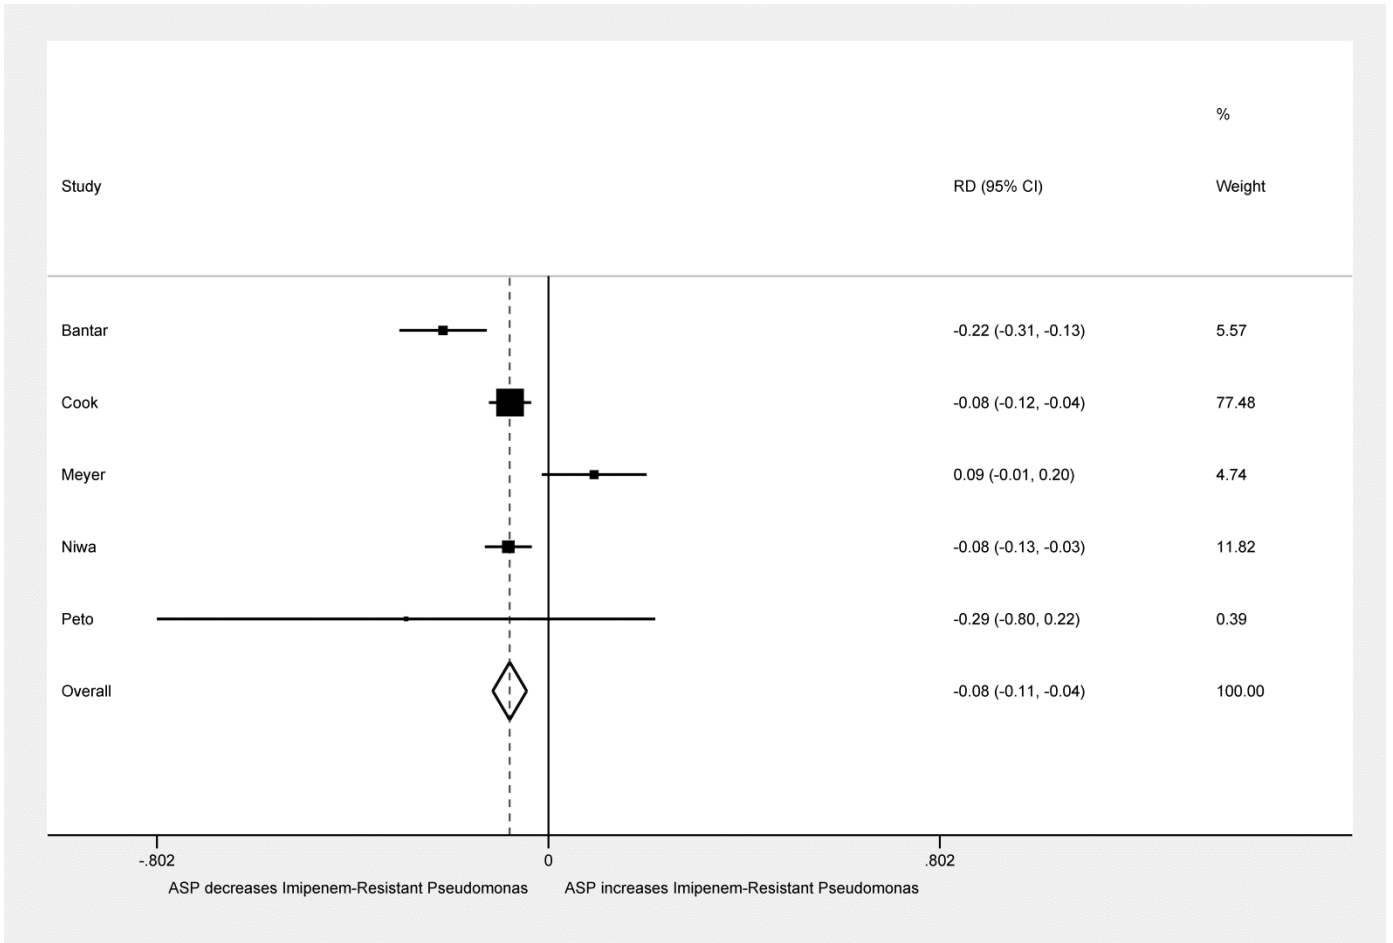

**Supplementary Figure 7. Forest plot of included studies.** Estimated Risk Difference (RD) in MRSA isolates before and after ASP implementation. CI, confidence interval. MRSA, methicillin-resistant *S. aureus*



**Supplementary Figure 8. Forest plot of included studies.** Estimated Risk Difference (RD) in imipenem-resistant *P.aeruginosa* isolates before and after ASP implementation. CI, confidence interval.

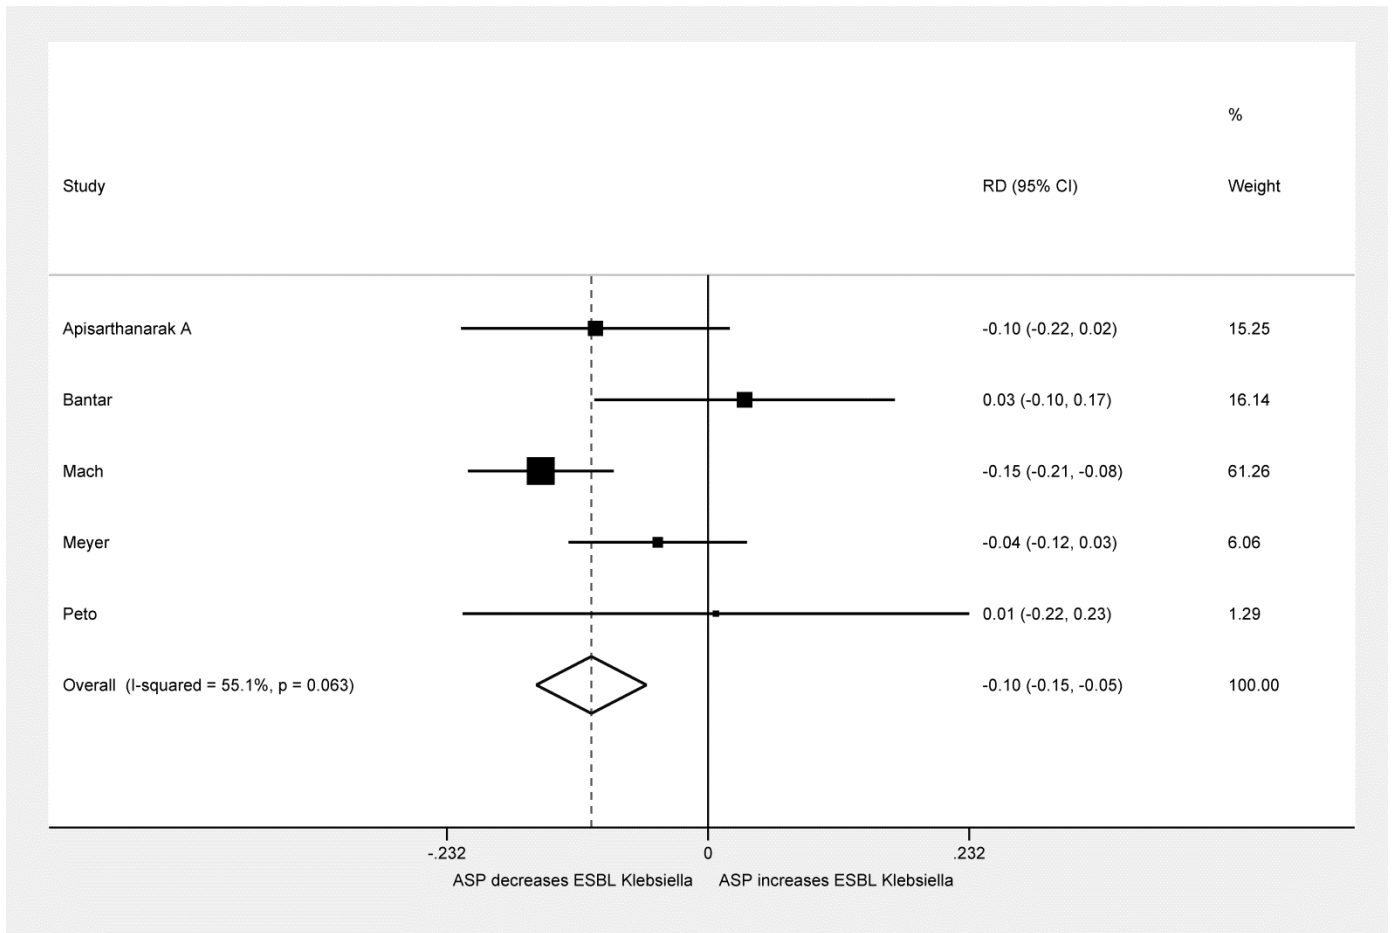

**Supplementary Figure 9. Forest plot of included studies.** Estimated Risk Difference (RD) in ESBL-*Klebsiella* isolates before and after ASP implementation. CI, confidence interval. ESBL, extended-spectrum beta-lactamase.
